# Supplementary material for: A porous polycrystalline NiCo2Px as a highly efficient host for sulfur cathodes in Li–S batteries
Source: Royal Society of Chemistry journal article supplement (doi:10.1039/d1ta06249b), 2021-01-01
Supplement: d1ta06249b1.pdf [file d1ta06249b1.pdf]

## A Porous Polycrystalline NiCo<sub>2</sub>P<sub>x</sub> As Highly Efficient Host For Sulfur Cathode of Li-S batteries

Lu Wang<sup>†,a</sup> Meng Zhang,<sup>†,a</sup> Bo Zhang,<sup>a</sup> Bin Wang,<sup>a</sup> Jianmin Dou,<sup>b</sup> Zhen Kong,<sup>a</sup> Chunsheng Wang,<sup>a</sup> Xiuping Sun,<sup>a</sup> Yitai Qian,<sup>a</sup> Liqiang Xu<sup>\*a</sup>

### Contents

|                   |                                                                                                                                                                                                        |
|-------------------|--------------------------------------------------------------------------------------------------------------------------------------------------------------------------------------------------------|
| <b>Figure S1</b>  | XRD pattern of the amorphous Ni/Co containing precursor and the derived NiCo <sub>2</sub> O <sub>4</sub> .                                                                                             |
| <b>Figure S2</b>  | TEM and SEM image of the amorphous Ni/Co precursor and the NiCo <sub>2</sub> O <sub>4</sub> .                                                                                                          |
| <b>Figure S3</b>  | TEM images of amorphous Ni/Co precursor synthesized with different PVP dosages.                                                                                                                        |
| <b>Figure S4</b>  | EDX spectrum of NiCo <sub>2</sub> P <sub>x</sub> .                                                                                                                                                     |
| <b>Figure S5</b>  | TGA curves of the NiCo <sub>2</sub> P <sub>x</sub> and NiCo <sub>2</sub> O <sub>4</sub> /rGO/S composite.                                                                                              |
| <b>Figure S6</b>  | Color comparison among the blank Li <sub>2</sub> S <sub>6</sub> solution and those soaked with NiCo <sub>2</sub> P <sub>x</sub> , NiCo <sub>2</sub> O <sub>4</sub> , and rGO.                          |
| <b>Figure S7</b>  | N <sub>2</sub> adsorption/desorption isotherms and pore size distribution curve for NiCo <sub>2</sub> P <sub>x</sub> and NiCo <sub>2</sub> O <sub>4</sub> .                                            |
| <b>Figure S8</b>  | High resolution XPS spectra for the Ni 2p and Co 2p of NiCo <sub>2</sub> O <sub>4</sub> , before and after adsorption of Li <sub>2</sub> S <sub>6</sub> .                                              |
| <b>Figure S9</b>  | High resolution XPS spectra for the Ni 2p and Co 2p of NiCo <sub>2</sub> P <sub>x</sub> , before and after adsorption of Li <sub>2</sub> S <sub>6</sub> .                                              |
| <b>Figure S10</b> | HRTEM image of NiCo <sub>2</sub> O <sub>4</sub> and its lattice plane (111).                                                                                                                           |
| <b>Figure S11</b> | Electrochemical measurements of NiCo <sub>2</sub> P <sub>x</sub> /rGO/S, NiCo <sub>2</sub> O <sub>4</sub> /rGO/S and /rGO/S.                                                                           |
| <b>Figure S12</b> | The Charge/discharge profiles, Tafel plots and EIS spectra between the NiCo <sub>2</sub> P <sub>x</sub> /rGO/S and NiCo <sub>2</sub> O <sub>4</sub> /rGO/S cathodes.                                   |
| <b>Figure S13</b> | Density of states of NiCo <sub>2</sub> O <sub>4</sub> , CoP <sub>3</sub> , Ni <sub>2.55</sub> P and NiCoP.                                                                                             |
| <b>Figure S14</b> | Cycling performance of NiCo <sub>2</sub> P <sub>x</sub> /rGO/S cathode measured at 1C upon mass loading of sulfur over 3.0 mg <sub>S</sub> cm <sup>-2</sup> and electrolyte of 10μL mg <sup>-1</sup> . |
| <b>Table S1</b>   | The content of the Ni/Co-contained species in the measured spectra of samples.                                                                                                                         |

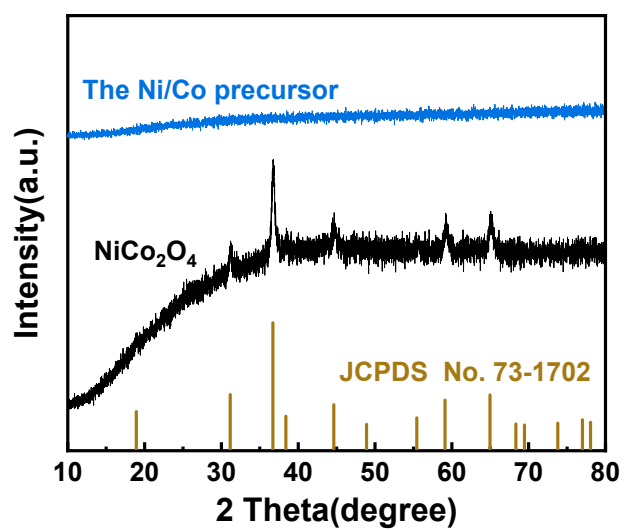

**Figure S1.** XRD pattern of the amorphous Ni/Co containing precursor and the derived NiCo<sub>2</sub>O<sub>4</sub>.

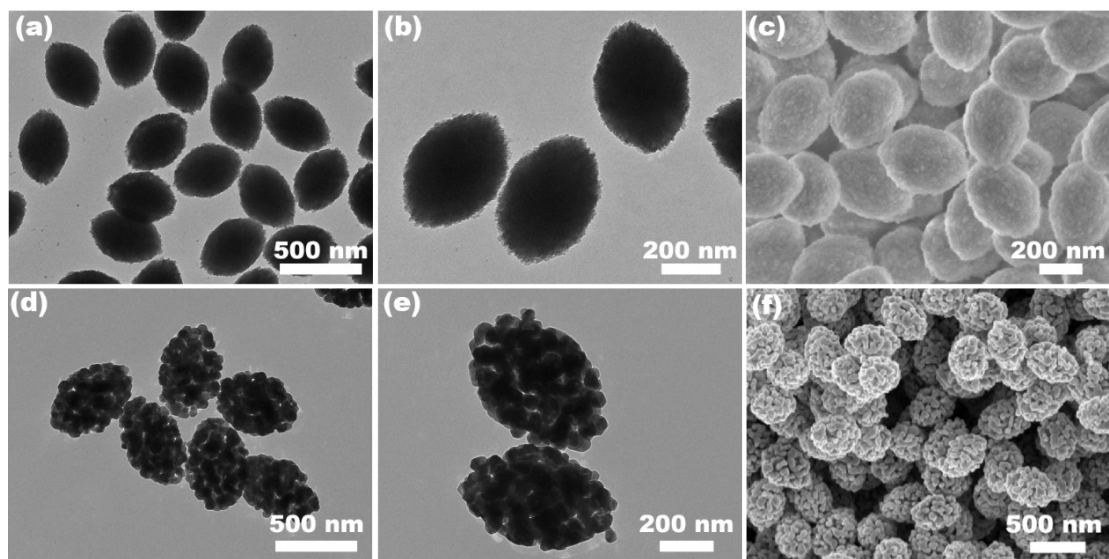

**Figure S2.** (a), (b) TEM images and (c) SEM image of the amorphous Ni/Co precursor; (d), (e) TEM images and (f) SEM image of the NiCo<sub>2</sub>O<sub>4</sub>.

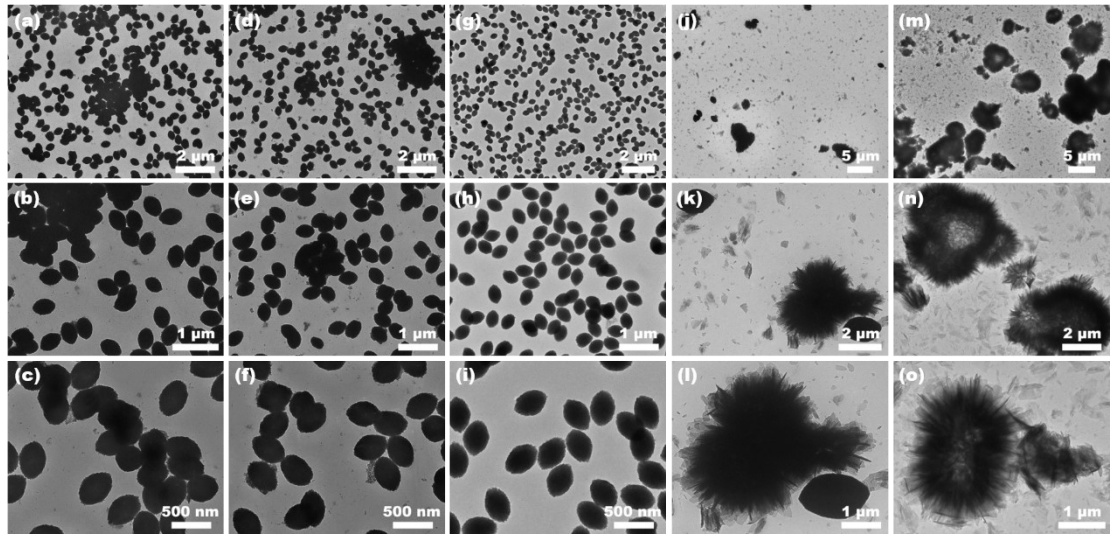

**Figure S3.** TEM images of amorphous Ni/Co precursor synthesized with different PVP dosage: (a)-(c) 160 mg; (d-f) 180 mg ; (g-i) 200 mg ; (j-l) 220 mg ; (m-o) 240 mg.

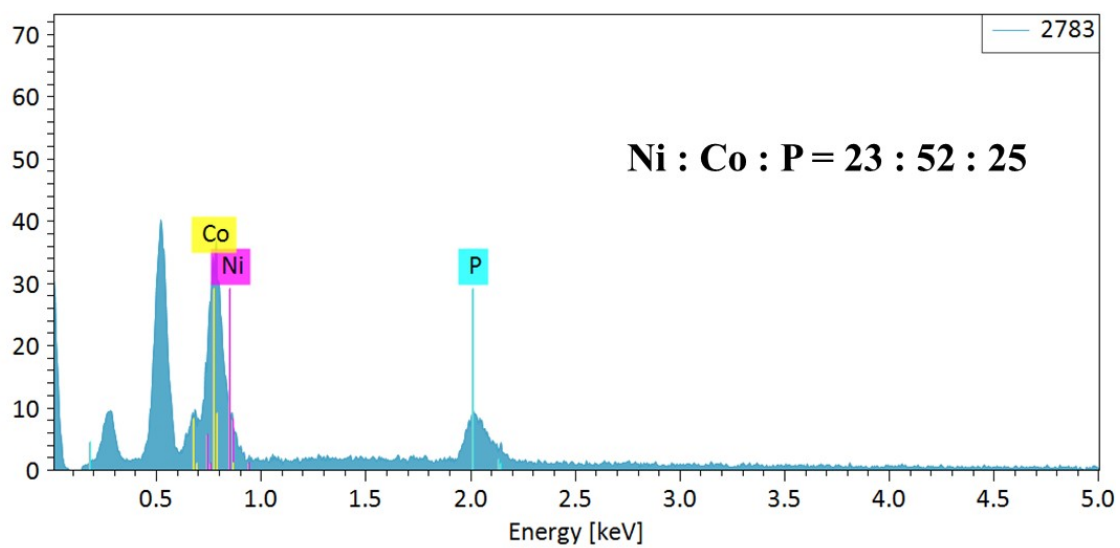

**Figure S4.** EDX spectrum of  $\text{NiCo}_2\text{P}_x$ , where content of O and P in the  $\text{NiCo}_2\text{P}_x$  is 65.70 at% and 11.17 at%, respectively (with a ratio of 5.88: 1).

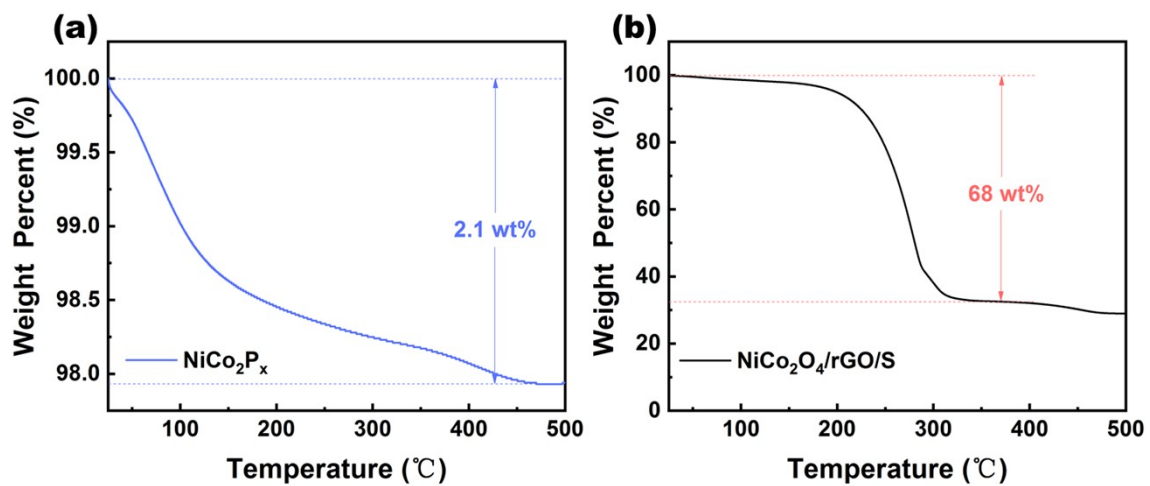

Figure S5. TGA curves of the  $\text{NiCo}_2\text{P}_x$  and  $\text{NiCo}_2\text{O}_4/\text{rGO}/\text{S}$  composite.

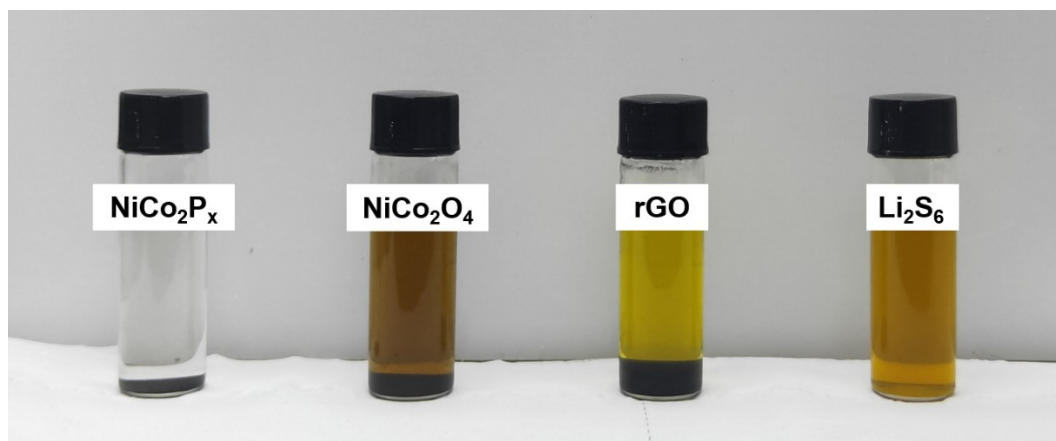

**Figure S6.** Color comparison among the blank  $\text{Li}_2\text{S}_6$  solution and those soaked with  $\text{NiCo}_2\text{P}_x$ ,  $\text{NiCo}_2\text{O}_4$ , and rGO.

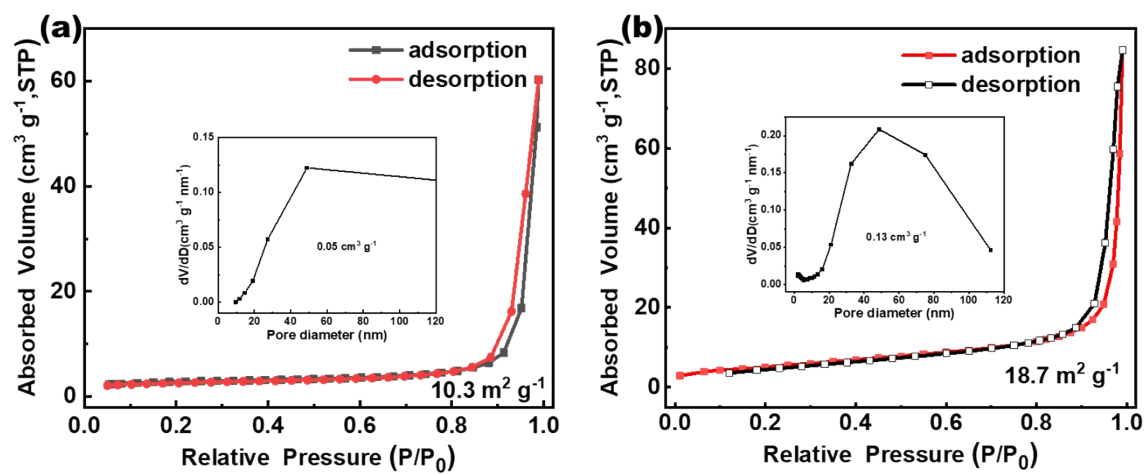

**Figure S7.**  $N_2$  adsorption/desorption isotherms and their pore size distribution curves (inset) of (a)  $NiCo_2O_4$  and (b)  $NiCo_2P_x$ .



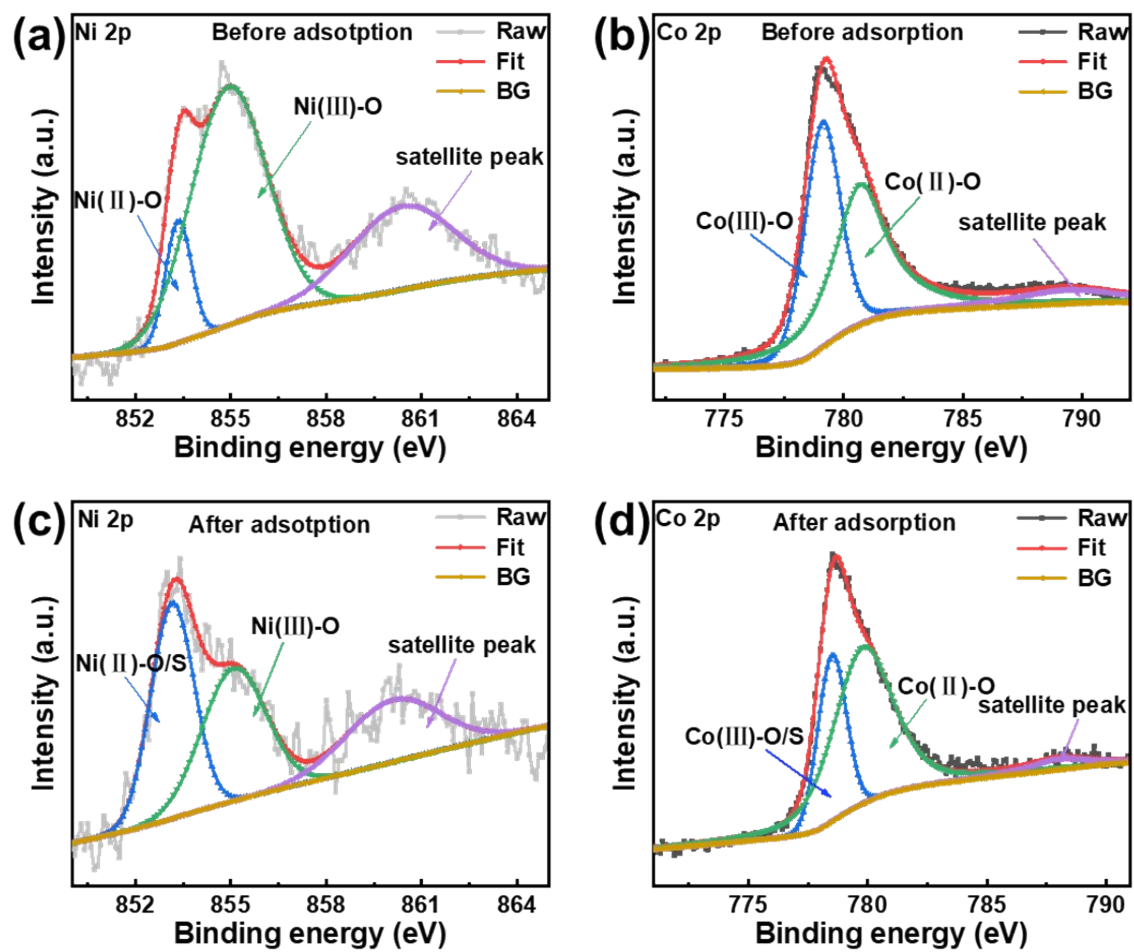

**Figure S8.** High resolution XPS spectra for the Ni 2p and Co 2p of NiCo<sub>2</sub>O<sub>4</sub>, before and after adsorption of Li<sub>2</sub>S<sub>6</sub>.

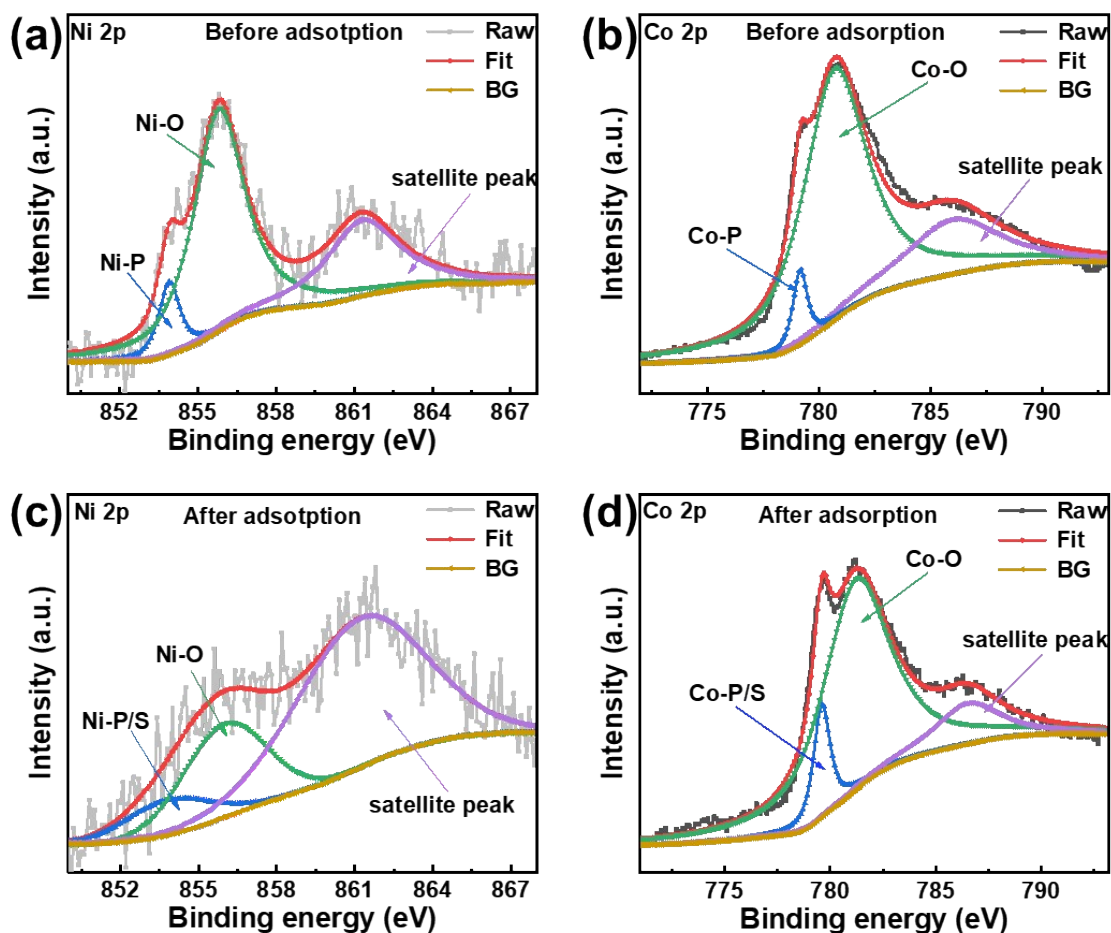

**Figure S9.** High resolution XPS spectra for the Ni 2p and Co 2p of  $\text{NiCo}_2\text{P}_x$ , before and after adsorption of  $\text{Li}_2\text{S}_6$ , where content of O and P in the  $\text{NiCo}_2\text{P}_x$  before adsorption of  $\text{Li}_2\text{S}_6$  are determined to be 55.33 at% and 9.77 at%, respectively (with a ratio of 5.66: 1).

| Sample                    | XPS peaks | Before adsorption |       | After adsorption |       |
|---------------------------|-----------|-------------------|-------|------------------|-------|
|                           |           | Ni 2p             | Co 2p | Ni 2p            | Co 2p |
| $\text{NiCo}_2\text{P}_x$ | 0#        | 0.084             | 0.048 | 0.094            | 0.100 |
|                           | 1#        | 0.615             | 0.727 | 0.249            | 0.757 |
| $\text{NiCo}_2\text{O}_4$ | 0#        | 0.107             | 0.396 | 0.394            | 0.279 |
|                           | 1#        | 0.605             | 0.499 | 0.361            | 0.664 |

Peak 0# refers to the species at low binding energy and peak 1# refers to the ones at medium binding energy in the high resolution spectra.

**Table S1.** The content of the Ni/Co-contained species in the measured spectra of corresponding samples.

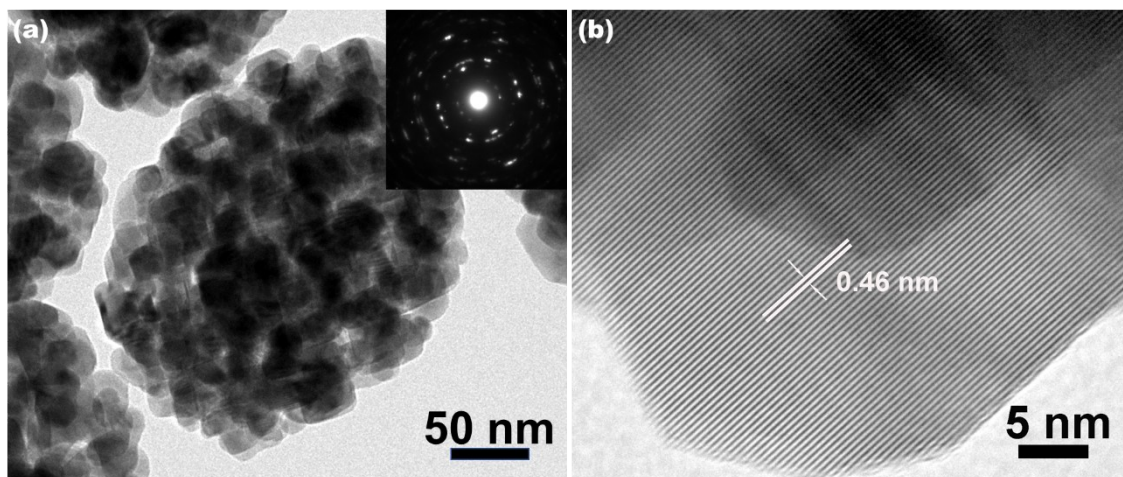

**Figure S10.** HRTEM image of NiCo<sub>2</sub>O<sub>4</sub> and its lattice plane (111).

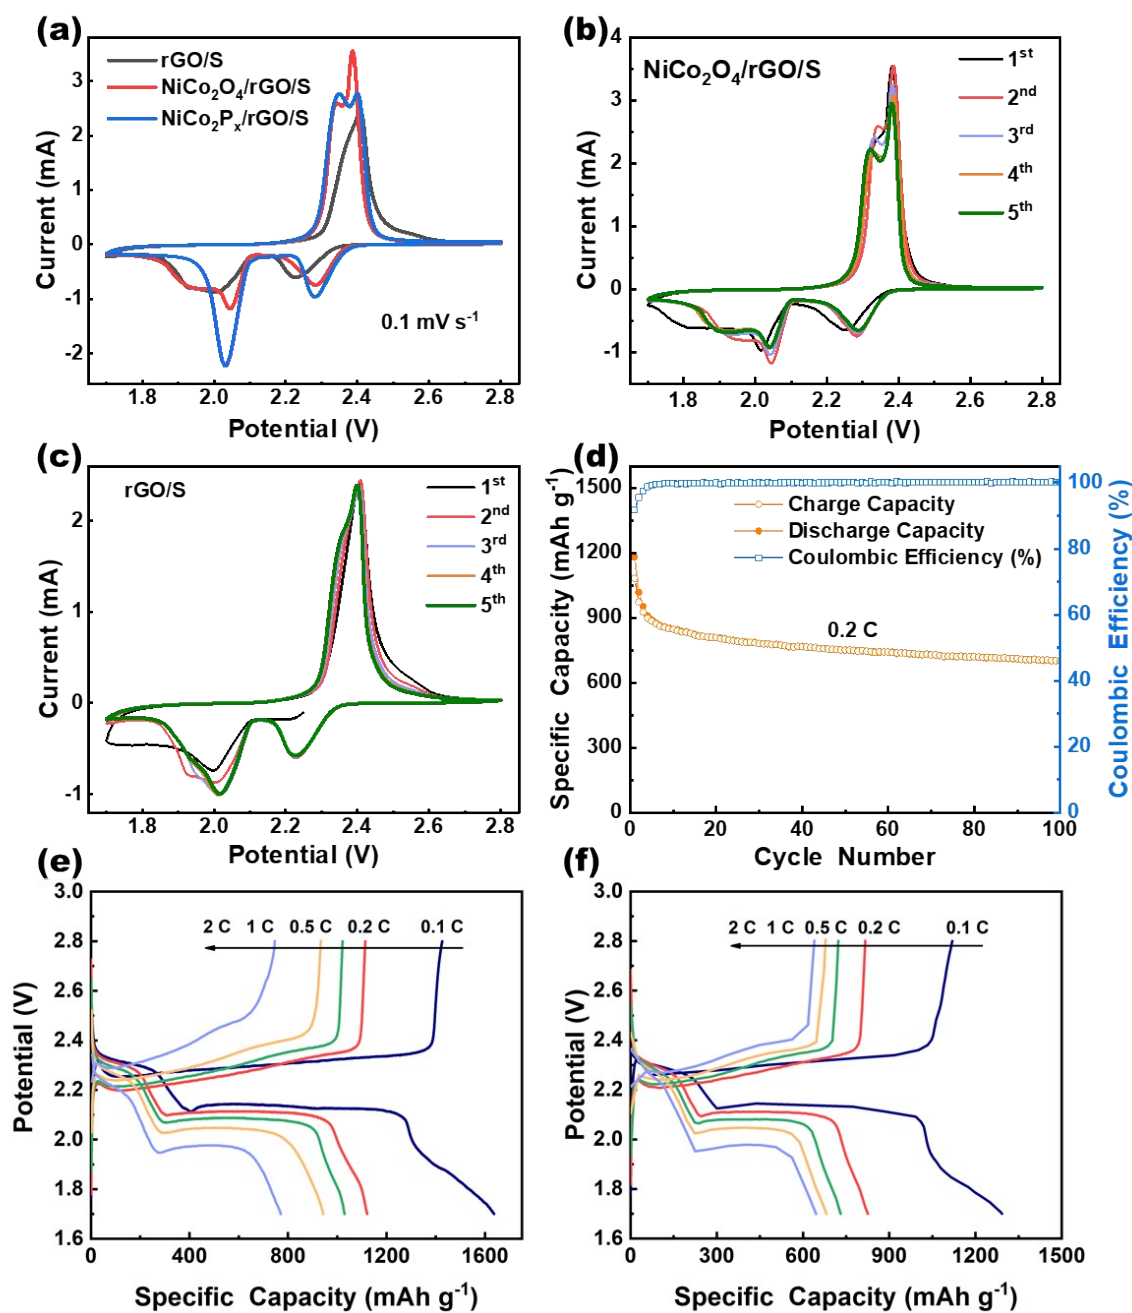

**Figure S11.** (a) The second cycle of CV curves for NiCo<sub>2</sub>P<sub>x</sub>/rGO/S, NiCo<sub>2</sub>O<sub>4</sub>/rGO/S and rGO/S cathodes; (b) The initial five cycles of CV curves for NiCo<sub>2</sub>O<sub>4</sub>/rGO/S cathode; (c) The initial five cycles of CV curves for rGO/S cathode; (d) Cyclic performance for rGO/S cathode at 0.2 C. (e), (f) Corresponding discharge/charge plots at various current densities for NiCo<sub>2</sub>P<sub>x</sub>/rGO/S, NiCo<sub>2</sub>O<sub>4</sub>/rGO/S, respectively.

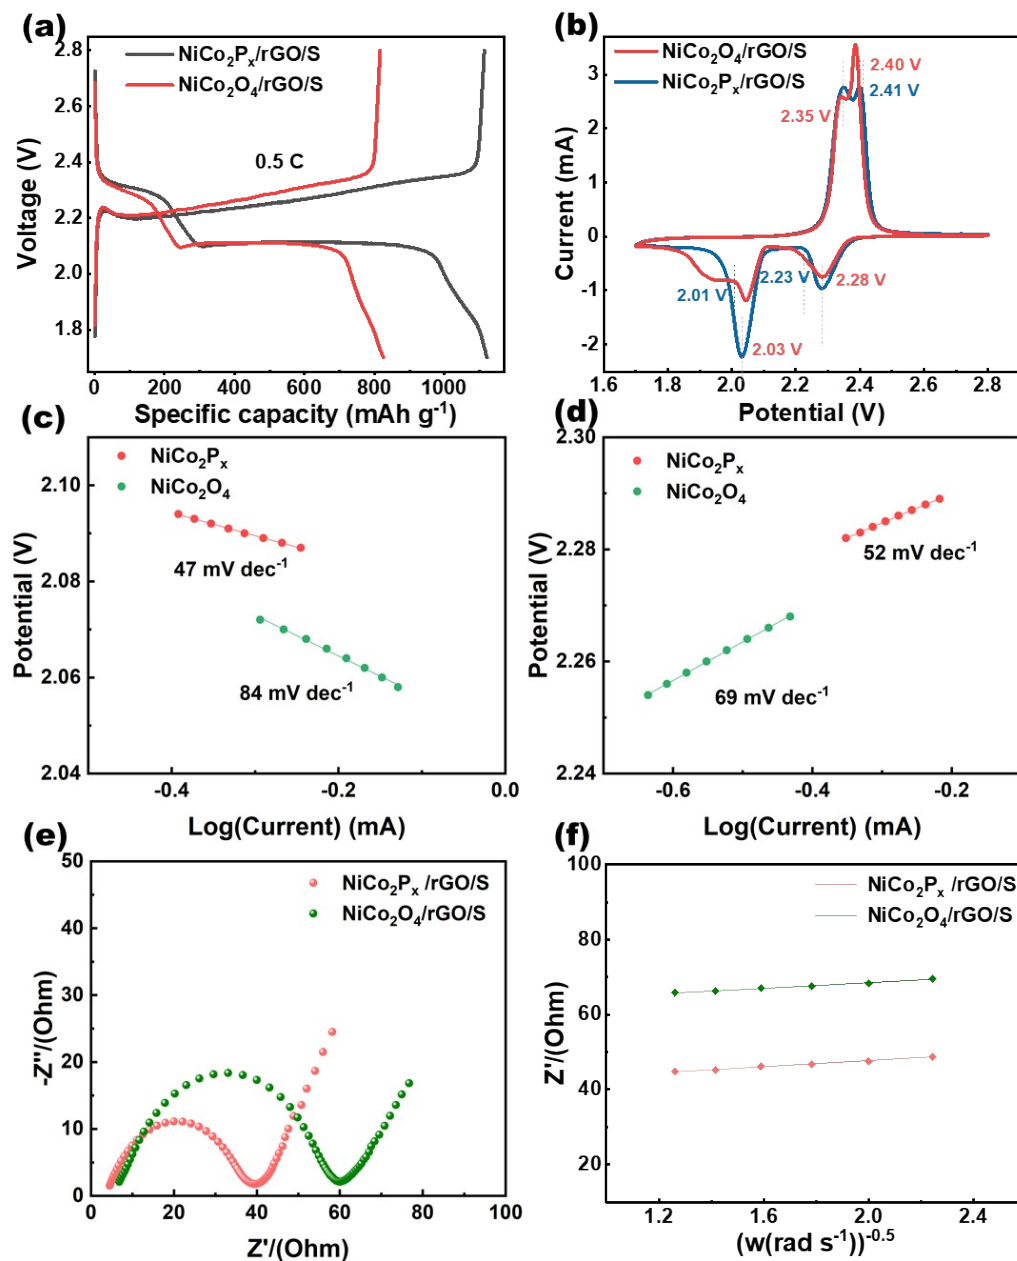

**Figure S12.** (a) Charge/discharge profiles of the  $\text{NiCo}_2\text{P}_x/\text{rGO}/\text{S}$  and  $\text{NiCo}_2\text{O}_4/\text{rGO}/\text{S}$  electrodes at 0.5 C; (b) The CV curves of 2<sup>nd</sup> cycle for the  $\text{NiCo}_2\text{P}_x/\text{rGO}/\text{S}$  and  $\text{NiCo}_2\text{O}_4/\text{rGO}/\text{S}$  electrodes at scan rate of  $0.1 \text{ mV s}^{-1}$ ; (c), (d) The Tafel plots derived from (b); (e) EIS spectra of  $\text{NiCo}_2\text{P}_x/\text{rGO}/\text{S}$  and  $\text{NiCo}_2\text{O}_4/\text{rGO}/\text{S}$  electrodes; (f) linear fitting plot of  $-Z''$  versus  $\omega^{-1/2}$ .

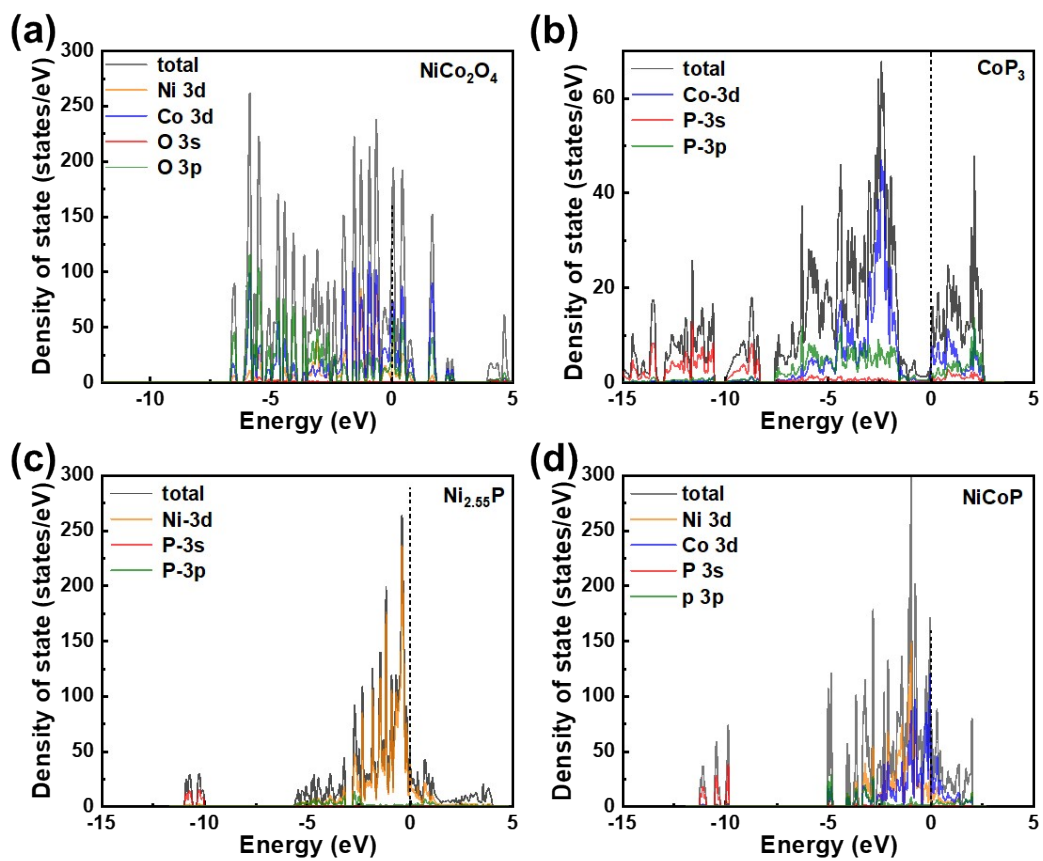

**Figure S13.** Density of states of (a)  $\text{NiCo}_2\text{O}_4$ , (b)  $\text{CoP}_3$ , (c)  $\text{Ni}_{2.55}\text{P}$  and (d)  $\text{NiCoP}$ .

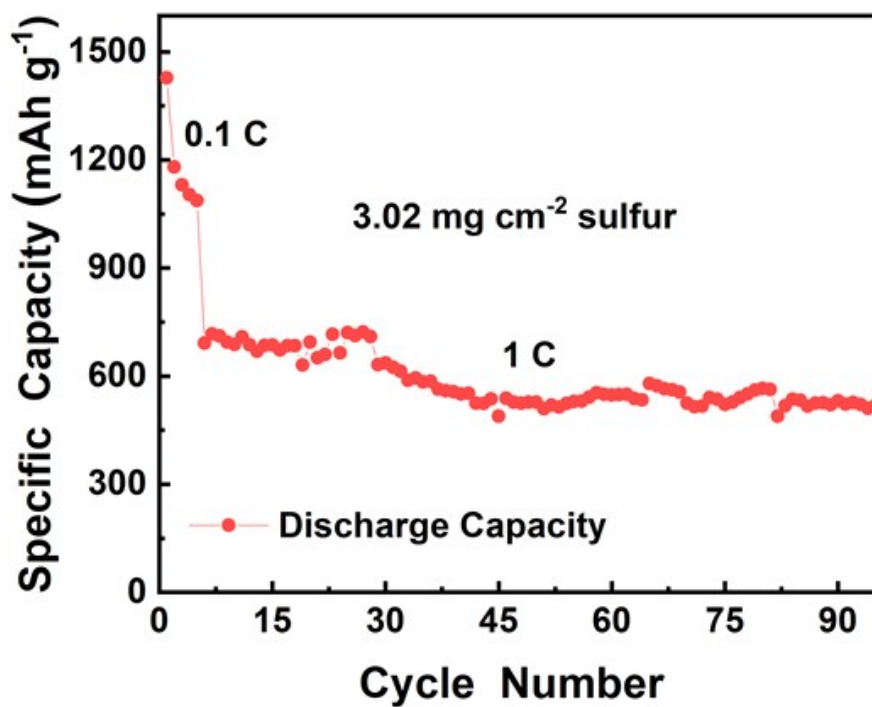

**Figure S14.** Cycling performance of NiCo<sub>2</sub>P<sub>x</sub>/rGO/S cathode measured at 1C upon mass loading of sulfur over 3.0 mg<sub>S</sub> cm<sup>-2</sup> and electrolyte of 10 μL mg<sup>-1</sup>.
